# Supplementary figures and images for: First-in-Human Phase I Clinical Trial of Pharmacologic Ascorbate Combined with Radiation and Temozolomide for Newly Diagnosed Glioblastoma
Source: Oxford University Press journal article supplement (doi:10.1158/1078-0432.ccr-19-0594), 2019-08-19

S1A

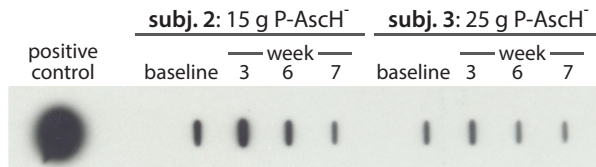

S1C

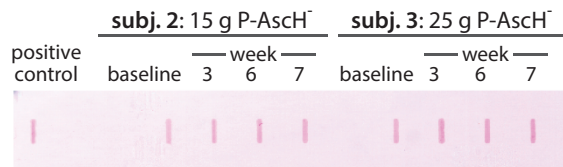

S1B

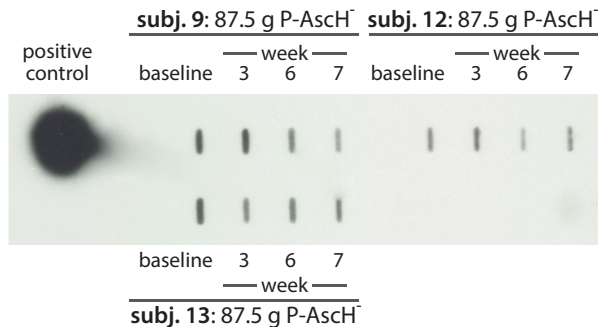

S1D

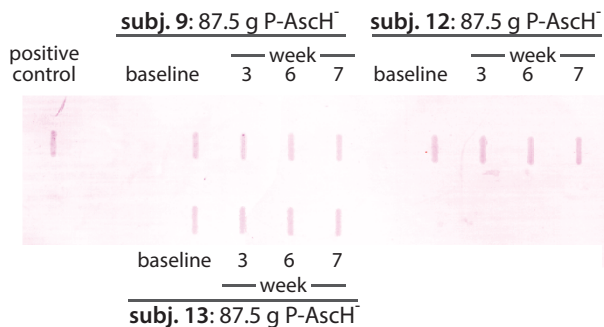

S1E

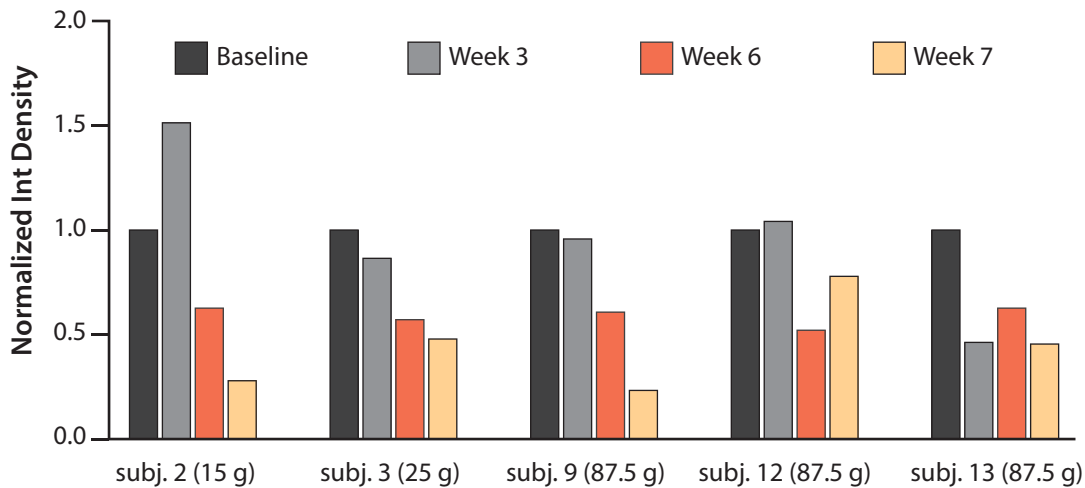

Supplement: 10780432ccr190594-sup-217554_2_supp_5696998_pvvg3s.pdf [file 10780432ccr190594-sup-217554_2_supp_5696998_pvvg3s.pdf]
